# Supplementary material for: Combining Translation Readthrough Inducing Drugs and Nonsense Mediated Decay Pathway Inhibition to Rescue of CFTRW1282X in Cystic Fibrosis Cell Model System
Source: Preprints.org preprint supplement (doi:10.20944/preprints202406.2061.v1), 2024-06-29
Supplement: Supplementary file 1 [file supplementary]

*Supplementary Material*

**Combining Translation Readthrough Inducing Drugs and Nonsense Mediated Decay Pathway Inhibition to Rescue of CFTRW1282X in Cystic Fibrosis Cell Model System**

Roberta Bongiornoa,b, Emanuele Vitalea, Davide Riccia, Pietro Salvatore Carolloa,*, Ivana Pibiria, Raffaella Melfia, Andrea Pacea and Laura Lentinia,*

aDipartimento di Scienze e Tecnologie Biologiche, Chimiche e Farmaceutiche (STEBICEF), Università degli Studi di Palermo, Viale delle Scienze Ed. 16-17, 90128 Palermo, Italy; b Fondazione IRCCS, Istituto Nazionale dei Tumori, Via Amadeo 42, 20133, Milano, Italy; roberta.bongiorno@istitutotumori.mi.it (R.B.); [emanuele.vitale@unipa.it](mailto:emanuele.vitale@unipa.it) (E.V.); [davide.ricci@unipa.it](mailto:davide.ricci@unipa.it) (D.R.); pietrosalvatore.carollo@community.unipa.it (P.S.C.); raffaella.melfi@unipa.it (R.M.); andrea.pace@unipa.it (A.P.).

***** Correspondence: laura.lentini@unipa.it (L.L.); [pietrosalvatore.carollo@ibfm.cnr.it](mailto:pietrosalvatore.carollo@ibfm.cnr.it) (P.S.C.).Tel.: +39-091-238-97341 (L.L.).

**1. Chemical characterization of compounds NV848 and NV914**

Melting points were determined by Kofler. 1H NMR and 13C NMR spectra were registered on a Bruker 300 Avance (300 MHz) spectrometer, with TMS as an internal standard. IR spectra were recorded by a Shimadzu FTIR-8300 instrument (Shimadzu Corporation, Kyoto, Japan). Chromatography for purification of the samples was realized by flash silica gel (Merck, 0.040–0.063 mm) and mixtures of petroleum ether (fraction boiling at 40–60 ◦C) and ethyl acetate as eluents. HRMS spectra were recorded by analyzing a 10 ppm solution of each sample in a 6540 UHD Accurate-Mass Q-TOF LC/MS (Agilent Technologies, Inc., Santa Clara, CA, USA) equipped with a Dual AJS ESI source. Int. J. Mol. Sci. 2020, 21, 6420 11 of 18 3.2.1. Synthesis of NV848 (N-(5-methyl-1,2,4-oxadiazol-3-yl) acetamide)

**NV848**: MP 162–163 ◦C. FT-IR (cm−1 ): 3255, 3205, 3122, 1694. 1H NMR (DMSO-d6) δ (ppm): 2.15 (s, 3H), 2.60 (s, 3H), 10.85 (s, 1H). HRMS for C5H7N3O2 found 142.0535 [M + H]+ (Calcd. 142.0538).

**NV914**: MP 208–210 ◦C. FT-IR (cm−1 ), 3290, 3180, 1750. 1H NMR (300 MHz, CDCl3) δ (ppm): 9.09 (s, 1H), HRMS for C15HF10N3O2 found 445.9914 [M + H]+ (Calcd. 445.9909).
